15 **Abstract**

16 The cytoplasmic domain of the receptor tyrosine kinases (RTKs) plays roles as a  
17 phosphorylation enzyme and a protein scaffold but the regulation of these two functions  
18 is not fully understood. We here analyzed assembly of the transmembrane (TM)-  
19 juxtamembrane (JM) region of EGFR, one of the best studied species of RTKs, by  
20 combining single-pair FRET imaging and a nanodisc technique. The JM domain of EGFR  
21 contains a threonine residue that is phosphorylated after ligand association. We observed  
22 that the TM-JM peptides of EGFR form anionic lipid-induced dimers and cholesterol-  
23 induced oligomers. The two forms involve distinct molecular interactions, with a bias  
24 towards oligomer formation upon threonine phosphorylation. We further analyzed the  
25 functions of whole EGFR molecules, with or without a threonine to alanine substitution  
26 in the JM domain, in living cells. The results suggested an autoregulatory mechanism in  
27 which threonine phosphorylation of the JM domain causes a switch from kinase activation  
28 dimers to scaffolding oligomers.

29

## 30 **Introduction**

31 Epidermal growth factor receptor (EGFR) is an RTK responsible for cell proliferation and  
32 differentiation (1, 2) and consists of five domains; an extracellular domain that interacts  
33 with extracellular ligands, a single-pass transmembrane (TM) helix, a juxtamembrane  
34 (JM) domain, a cytoplasmic kinase domain, and a C-terminal tail domain for interaction  
35 with various cytoplasmic proteins (3, 4). Ligand association changes the conformation of  
36 EGFR in its extracellular domain (5) and induces formation of an asymmetric dimer of  
37 the intracellular kinase domains (6). This dimerization subsequently results in the  
38 phosphorylation of tyrosine residues on the tail domain and the recruitment of  
39 intracellular signal proteins such as GRB2 and PLC $\gamma$  containing SH2 and/or PTB domains  
40 (7). Although the atomic structures of most of the EGFR domains excluding the tail  
41 domain have been elucidated individually (5, 6, 8-10), the overall architecture of this  
42 protein has not yet been revealed, leaving several unanswered questions about the  
43 molecular mechanisms underlying its functions. The correlation between the arrangement  
44 of EGFR molecules and their function is therefore still controversial, e.g., it has long been  
45 established that the dimerization of EGFR is necessary and sufficient for kinase activation  
46 (11), whereas several studies have reported the importance of higher-order  
47 oligomerization for EGFR-mediated signal transduction (12-14).

48 The TM helix and the JM domain (TM-JM) of EGFR play important roles in the  
49 conformational coupling of ligand binding to its activation and oligomerization (9, 11,  
50 15). Previous NMR studies and molecular dynamics simulations have suggested that the  
51 TM domain forms an  $\alpha$ -helix dimer that undergoes a configuration change following the  
52 ligand association with its extracellular domains (16, 17). This information regarding  
53 conformational changes in the TM dimer is then transmitted to the JM domain which  
54 comprises a JM-A (N-terminal half) region that can form an antiparallel helix dimer, and  
55 a JM-B (C-terminal half) region which makes intramolecular contact with the kinase  
56 domain (11). Both these JM regions contribute to the stable formation of an asymmetric  
57 kinase dimer conformation, which is crucial for kinase activation. The JM-A domain is  
58 rich in Lys and Arg residues, several of which are thought to interact with anionic lipid  
59 molecules of the plasma membrane and promote antiparallel dimer formation (18-20). In  
60 addition to the phospholipid species, cholesterol is a major component of the plasma  
61 membrane, mainly distributed as lipid rafts and caveolae, and has been implicated in the  
62 regulation of membrane fluidity and receptor function. Previous studies have shown that  
63 EGFR molecules are clustered in lipid rafts (14, 21), suggesting an interaction with  
64 cholesterol. Of note in this regard, it has been reported that the depletion of cholesterol  
65 induces various effects on EGFR signaling, also this remains controversial (22-24).

66 Another important factor in the regulation of EGFR through the TM-JM is the  
67 phosphorylation of Thr654 at the JM-A domain. Although Thr phosphorylation is known  
68 to be involved in EGFR deactivation, the precise mechanism of this is still elusive (25).

69 In our present study, by combining single-pair FRET measurements and  
70 nanodisc technology, we studied how the functions of anionic lipids, cholesterol, and  
71 EGFR Thr654 phosphorylation (pT654) are orchestrated to achieve the regulation of  
72 dimerization and/or oligomerization of EGFR. We previously reported that anionic lipids  
73 cause the dimerization of JM domains, and that pT654 together with acidic lipids induces  
74 the dissociation of the EGFR dimer (19). In this current study, we report that both the TM  
75 and JM protomers of EGFR are positioned closer to each other in the presence of  
76 cholesterol than in the EGFR dimers promoted by anionic lipids. Furthermore, we found  
77 that TM-JM peptides were oligomerized in cholesterol containing membranes, which was  
78 promoted by pT654. Finally, in living cells expressing whole EGFR molecules, we  
79 observed differential functional roles of this crucial signaling factor that are dependent on  
80 the pT654 levels.

81

## 82 **Results**

### 83 **Incorporation of TM-JM peptides into nanodiscs**

84 Synthesized peptides of the TM-JM region of EGFR were prepared and labeled with a  
85 fluorophore Cy3 or Cy5 at the N-terminus (TM terminal region) or C-terminus (JM  
86 terminal region), respectively (Fig. 1a). The peptides were reconstituted into nanodisc  
87 structures with membrane scaffold proteins (MSPs) and lipid molecules (Fig. 1b, c).  
88 Mixtures of POPC (PC), POPS (PS), and cholesterol were used for reconstruction (Fig.  
89 1d). The nanodiscs containing cholesterol showed two peaks following size exclusion gel  
90 chromatography, one of which had a smaller disc size relative to that without cholesterol  
91 (Fig. 1e). To avoid the effects of disc size, we collected and used nanodiscs involved in  
92 the first peak fraction which had a similar size without cholesterol. Synthesized TM-JM  
93 peptides with pT654 were also reconstituted into nanodiscs. The nanodisc construction  
94 was examined under a transmission electron microscope (Fig. 1f). In total, 16 types of  
95 nanodiscs were applied to subsequent single-molecule measurements.

96

### 97 **TM-TM interaction in the EGFR dimer**

98 Nanodiscs containing Cy3 and Cy5-labeled peptides were immobilized onto glass  
99 surfaces and illuminated with a 532-nm laser for Cy3 excitation. A portion of the  
100 fluorescent spots contained Cy5 fluorescence derived from the occurrence of FRET (Fig.  
101 2a, b). Based on the fluorescence intensity, we selected nanodiscs containing one Cy3-  
102 and one Cy5-labeled peptide and calculated the FRET efficiency,  $E_{FRET}$  (Fig. 2c).

103 We first examined the interactions between the N-terminal regions of the TM  
104 domains (Fig. 3). When Thr654 was not phosphorylated and the membrane contained  
105 only PC as lipid species,  $E_{FRET}$  distributed with a peak at a relatively high (0.8~0.9) value  
106 (Fig. 3a), indicating close proximity of the two TM domains. There may be additional  
107 stable structures between the TM domains, as suggested by the small peaks and shoulders  
108 in the  $E_{FRET}$  distribution. The addition of anionic lipid PS caused few effects, i.e., the TM  
109 dimers were maintained as the major structure (Fig. 3b). Peptides with pT654 slightly  
110 decreased the major peak positions of the  $E_{FRET}$  distributions in the PC or PC/PS  
111 membranes (Fig. 3e, f). The smooth distribution of the pT654 peptides suggested that  
112 pThr654 had homogenized possible substructures of the TM dimers of non-  
113 phosphorylated peptides. PS had a little effect on the TM-TM interactions regardless of  
114 the Thr654 phosphorylation. The presence of cholesterol in the membrane concentrated  
115 the distributions to a high  $E_{FRET}$  (~0.9) region (Fig. 3c, g, h), indicating that the N-terminal  
116 regions of TM-TM dimers were positioned in extremely close proximity. It should be  
117 noted also that the accumulation at a high  $E_{FRET}$  region was a remarkable observation for

118 pT654 peptides. Thus, pT654 and the presence of membrane cholesterol decreased the  
119 distance between the two N-termini of the TM domains in cooperation. PS competed with  
120 cholesterol when Thr654 was non-phosphorylated (Fig. 3d).

121

### 122 **JM-JM interaction in the EGFR dimer**

123 To examine the effects of lipid species and pT654 on JM-JM interaction,  $E_{FRET}$   
124 distributions were determined under the C-terminus labeling (Fig. 4). In PC membrane,  
125  $E_{FRET}$  was broadly distributed with a peak around 0.7~0.8 (Fig. 4a). It is plausible that the  
126 JM-A dimers are fluctuating between minor dissociation and major association states. In  
127 the PC/PS membrane, the high FRET fraction was increased, indicating that PS stabilized  
128 the JM-A dimer conformation (Fig. 4b). pThr654 increased the low FRET fraction in the  
129 PC/PS membrane (Fig. 4f) but showed little effect in the PC membrane (Fig. 4e). These  
130 results confirmed the results of our previous study (19). Cholesterol moved the  $E_{FRET}$  peak  
131 between non-phosphorylated peptides to higher values (~0.9) regardless of whether it was  
132 a PC or PC/PS membrane (Fig. 4c, d), i.e., cholesterol forced the C-termini of the JM-A  
133 domains to position closer.

134 The mixed effects of cholesterol and pT654 on the JM-JM interaction were  
135 further examined. In the PC membrane (Fig. 4g), cholesterol increased the high FRET  
136 population to a comparable level to those shown for non-phosphorylated peptides.  
137 Cholesterol in the PC/PS membrane (Fig. 4h) reversed the  $E_{FRET}$  distribution seen in the  
138 PC/PS membrane without cholesterol (Fig. 4f) to that observed in the PC membrane (Fig.  
139 4e) i.e. minor low FRET and major high FRET states in the PC/PS/cholesterol membrane.  
140 However, it should be noted that the  $E_{FRET}$  values were not as large as those found in other  
141 conditions with cholesterol (Fig. 4c, d, g), i.e., the cholesterol effect on JM-JM interaction  
142 was partially diminished by the coexistence of PS and pThr654. Overall, our data showed  
143 that cholesterol increased the proximity between the C-terminus of JM domains in PC  
144 and PC/PS membranes, and that this effect overrode that of pThr654 in the PC/PS  
145 membrane.

146

### 147 **Higher-order oligomerization of TM-JM peptides**

148 We speculated that the accumulation of EGFR in lipid rafts, which has been reported in  
149 previous studies, could be an effect of cholesterol in the raft membrane. We examined the  
150 assembly of TM-JM peptides in the nanodiscs, collecting images of fluorescent spots  
151 containing only Cy3-labeled peptides to avoid interference from the effects of FRET  
152 occurring between Cy3 and Cy5. Figure 5 displays the fluorescence intensity histograms  
153 of C-terminus-labeled TM-JM peptides in nanodiscs containing or not-containing

154 cholesterol. Cholesterol shifted the histograms toward higher intensities for the pT654  
155 peptides (Fig. 5b, d), suggesting a cooperative effect of cholesterol and Thr  
156 phosphorylation to induce higher-order assembly of the TM-JM peptides.

157

### 158 **Assembly of TM regions**

159 For analysis of the interactions between more than two TM or JM domains in the  
160 assembled structures at the N-terminus, images of fluorescent spots containing two Cy3-  
161 labeled peptides and one Cy5-labeled peptide were collected based on their 2-color  
162 fluorescence trajectories (Fig. 6a). These nanodiscs showed a variety of Cy3 donor  
163 fluorescence intensities before Cy5 photobleaching indicating that the three peptides  
164 interacted diversely. We constructed maximum fluorescence intensity histograms in the  
165 Cy3 donor channel before and after Cy5 acceptor photobleaching for inference of the  
166 interactions between three TM domains (Fig. 6b–i). In all conditions other than non-  
167 phosphorylated peptides in the PC/PS membrane, Cy3 distributions after Cy5  
168 photobleaching (red) peaked at the fluorescence intensity of ~100 (in arbitrary units),  
169 which was smaller than that observed for the C-terminal-labeled peptides (~150; Fig. 7b–  
170 i). This result must have been caused by homo-FRET (self-quenching) between two N-  
171 terminal labeled Cy3 peptides. Together with the very small intensity peaks prior to Cy5  
172 photobleaching (blue), these distributions suggested that TM regions of the three peptides  
173 (two of them were randomly labeled with Cy3) were oligomerized in very close proximity  
174 to each other in the major configuration (trimer; Fig. 6j).

175 For non-phosphorylated peptides in the PC/PS membrane however (Fig. 6c), the  
176 Cy3 intensity histogram after Cy5 photobleaching (red) had a peak intensity at ~150,  
177 indicating that two Cy3-labeled peptides in the major population were positioned  
178 separately. In addition, the low intensity shoulder in this distribution indicated the  
179 presence of proximate dimers (and trimers). Taken together, these distributions suggested  
180 that N-terminal regions of three non-phosphorylated peptides have a stronger tendency to  
181 arrange as one dimer and one monomer in the PC/PS membrane than any other condition.  
182 A similar dimer + monomer arrangement might be contained in the distributions under  
183 other conditions as a minor fraction. Consistent with this suggestion, for the non-  
184 phosphorylated peptides in PC/PS membrane before Cy5 photobleaching (Fig. 6c, blue),  
185 a homo-FRET fraction (~100; with a low  $E_{FRET}$  to Cy5) was evident compared to other  
186 conditions. It should be noted that the ability of PS to promote the dimer + monomer  
187 arrangement was diminished for pT654 peptides (Fig. 6g). Cholesterol also reduced this  
188 effect of PS even for non-phosphorylated peptides (Fig. 6e). As observed in the earlier  
189 analysis of the TM-JM peptide dimer (Fig. 3), the effects of PS and cholesterol were

190 competitive.

191

### 192 **Assembly of JM regions**

193 We constructed Cy3 fluorescence intensity histograms of two Cy3 and one Cy5 peptide  
194 with C-terminal-labeling in single nanodiscs in order to analyze the interactions between  
195 three JM domains (Fig. 7). The distributions of the Cy3 fluorescence after Cy5  
196 photobleaching (red) were similar under all conditions, exhibiting a single peak at ~150,  
197 which was the fluorescence intensity of the two Cy3 molecules without strong  
198 interactions to induce homo-FRET. Both the trimer and dimer + monomer arrangements  
199 are possible if we assume that the three molecules in the trimer and two molecules in the  
200 dimer are not so close that they will induce homo FRET (Fig. 7j).

201 Prior to Cy5 photobleaching (blue), the distribution peaks were observed in the  
202 region of small Cy3 intensities indicating the proximity of both Cy3 molecules with Cy5  
203 to induce high  $E_{FRET}$ , as observed between two molecules in a nanodisc (Fig. 4), i.e., the  
204 formation of a JM trimer. An accumulation in the low intensity peak fraction was very  
205 evident for non-phosphorylated peptides in the membranes containing cholesterol (Fig.  
206 7d, e). On the other hand, fractions at the intensities similar to those observed after Cy5  
207 photobleaching were significant for pT654 peptides in the membrane without cholesterol  
208 (Fig. 7f, g). In general, pT654 peptides exhibited higher fluorescence intensity compared  
209 to non-phosphorylated peptides in the corresponding membrane lipid compositions. One  
210 possible explanation is that the fraction of high Cy3 intensity before Cy5 photobleaching  
211 represents a Cy3 dimer in the dimer + monomer arrangement of three peptides (Fig. 7j).  
212 Another possibility is that it was caused by an increased distance between three JM  
213 domains in trimers, resulting from Thr phosphorylation to reduce  $E_{FRET}$  (Fig. 7j top  
214 middle). These two arrangements could potentially coexist.

215 Considering the possible arrangement for the TM and JM regions of three TM-  
216 JM peptides together (Figs. 6 and 7), we conclude that cholesterol induces the closely  
217 proximate oligomerization of three JM domains of non-phosphorylated peptides whereas  
218 PS preferentially causes a dimer + monomer arrangement, and the Thr phosphorylation  
219 disrupts the JM dimer and facilitates oligomerization of peptides with separated JM  
220 domains in the presence of cholesterol (Fig. 8).

221

### 222 **Effect of Thr phosphorylation on the Tyr phosphorylation of EGFR**

223 Our single-molecule structural analysis suggested that pT654 is a key regulator of the  
224 molecular assembly of EGFR, which may affect its functions. We examined this  
225 possibility in living cells. It is known that PKC activation under EGF signaling induces



226 pT654 in EGFR. This process has been thought to be a negative feedback pathway in the  
227 EGFR system. We expressed a wild type (wt) or T654A mutant EGFR in CHO-K1 cells,  
228 which have no intrinsic expression of EGFR. An increase in pT654 was observed for wt  
229 EGFR after EGF stimulation, and treatment of these cells with phorbol-12-myristate 13-  
230 acetate (PMA), a PKC activator, caused stronger phosphorylation of Thr654 regardless  
231 of EGF stimulation (Fig. 9a). Application of a saturation amount (100 ng/ml) of EGF to  
232 the culture medium induced phosphorylation of Tyr1068 (pY1068) of both the wt and  
233 T654A mutant EGFR proteins (Fig. 9b). pY1068 is a major association site on EGFR for  
234 the adaptor protein GRB2 and its levels after EGF stimulation were significantly  
235 increased by the T654A mutation compared to wt, as expected from the negative effect of  
236 pT654, whereas pretreatment with PMA decreased the pY1068 level in both the wt and  
237 T654A mutant EGFR (Fig. 9c). The PMA-induced decrease in pY1068 for the wt protein  
238 could be a negative effect of increased pT654, but the similar result with the T654A  
239 mutant suggests that PMA has indirect effects independent of pT654.

240

#### 241 **Single-molecule imaging of the clustering and movement of EGFR**

242 We expressed EGFR (wt and T654A) fused with GFP in CHO-K1 cells and, by using  
243 single-molecule imaging, detected cluster size distributions and lateral diffusion  
244 movements of EGFR molecules in the plasma membrane (Fig. 10a). Clustering of EGFR  
245 was measured as the fluorescence intensity distribution of EGFR spots, and the lateral  
246 diffusion movements were measured as the increase in the mean square displacement  
247 (MSD) of the spots with time. Both measurements were performed before and after 10  
248 min of EGF application to the medium. Application of EGF to the medium induced  
249 clustering and immobilization of wt EGFR as we have reported previously(14, 26). The  
250 distributions of EGFR cluster size suggest formation of oligomers containing up to more  
251 than 10 molecules (Fig. 10b). The convex shapes of MSD curve with time indicate  
252 subdiffusion of EGFR molecules (Fig. 10c).

253 Even in the absence of EGF, PMA treatment of cells increased fractions of  
254 higher-order wt EGFR oligomers (Fig. 10b left), though diffusion movements were hardly  
255 affected by PMA (Fig. 10c left). This oligomerization was not as strong as that induced  
256 by EGF in the absence of PMA and application of EGF to the PMA treated cells was not  
257 induced further oligomerization at least up to 10 min. For T654A mutant, PMA treatment  
258 hardly affected both oligomerization (Fig. 10b right) and movements (Fig. 10c right) in  
259 the absence of EGF. These effects of PMA to induce EGFR oligomerization dependent  
260 on Thr654 is consistent to pT654-induced oligomerization of TM-JM peptides in  
261 nanodiscs. Changes in the cluster size and lateral mobility are summarized in Figure 10d.

262 Application of EGF immediately ( $< 1$  min) induced strong oligomerization and  
263 immobilized wt EGFR in cells without PMA treatment. In cells with PMA treatment, EGF  
264 did not induce further oligomerization but significantly decreased mobility of wt EGFR  
265 until 10 min. EGF also induced immediate strong oligomerization of T654A mutant  
266 independent of PMA treatment. T654A mutant was immediately oligomerized after EGF  
267 application in cells after PMA treatment, but immobilization took time.

268 In summary, single-molecule measurements suggest three states of EGFR  
269 oligomerization depends on pT654 and EGF association (Fig. 10d). PMA treatment of wt  
270 EGFR but not T654A mutant induced a medial level of oligomerization, which could be  
271 stabilized by pT654. Strong oligomerization observed under the weak pT654 level in wt  
272 EGFR and no pT654 in T654A mutant was caused by a distinct mechanism of pT654. On  
273 the other hand, it is possible that immobilization of EGFR relates with its tyrosine  
274 phosphorylation levels. Immobilization was more evident in T654A mutant in which  
275 pY1068 level was higher than that in wt EGFR, and PMA treatment decelerate  
276 immobilization and decreased pY1068 both in wt and T654A.

277

### 278 **Interaction of EGFR with GRB2**

279 We finally measured the interaction of EGFR with GRB2 in living cells using a split  
280 luciferase (NanoBiT) assay, in which the C-terminus of EGFR and the N-terminus of  
281 GRB2 were conjugated with the large BiT (LgBiT) and the small BiT (SmBiT) of  
282 NanoLuc luciferase (27), respectively. The association of EGFR and GRB2 promoted the  
283 formation of active luciferase to produce chemiluminescence emission (Fig. 11a). From  
284 the timecourses of the NanoBiT signal increases after EGF treatment of cells expressing  
285 the wt or T654A mutant EGFR (Fig. 11b), the maximum intensities indicated a dose  
286 dependent response to the EGF concentration in the medium (Fig. 11b, c). The maximum  
287 intensity was significantly increased after pretreatment with PMA in cells expressing wt  
288 EGFR (Fig. 11d), despite the fact that the pY1068 level was reduced after the PMA  
289 treatment (Fig. 9c). This effect of PMA was not observed to any extent with the T654A  
290 mutant, and the GRB2 association was not increased by this mutation in the absence of  
291 PMA, even though the pY1068 level after EGF stimulation was significantly increased  
292 in the mutant (Fig. 9c). The increase in GRB2 association observed for wt EGFR after  
293 PMA treatment was not likely to be an indirect effect of PMA because it was not observed  
294 for the T654A mutant, in which the pY1068 level was also affected by PMA. These results  
295 suggest that pT654 promotes the formation of a GRB2 recognition state for EGFR, and  
296 that the inhibition of Thr654 phosphorylation prevents a GRB2-EGFR association in spite  
297 of enhanced Tyr1068 phosphorylation.

## 298 Discussion

299 We have here studied the dimerization and oligomerization of EGFR molecules by  
300 reconstituting its TM-JM peptides into nanodiscs. As expected from the positively  
301 charged JM-A sequence and accumulation of EGFR in the raft membrane, PS and  
302 cholesterol affect the molecular assembly of the TM-JM peptides. Interestingly, these two  
303 lipid species each function in a specific fashion i.e. the  $E_{FRET}$  distributions between the  
304 two TM-JM peptides in the nanodiscs suggested that PS facilitates JM dimerization, while  
305 cholesterol induces closer positioning of both the TM and JM domains (Figs. 3 and 4). In  
306 addition, cholesterol promoted the oligomeric assembly of TM-JM peptides (Figs. 6 and  
307 7). We herein propose schematic models for the formation of the EGFR TM-JM dimers  
308 and trimers under various conditions of lipid exposure and Thr654 phosphorylation (Fig.  
309 8), in which PS and cholesterol exert competitive effects on dimerization and  
310 oligomerization, and pT654 disrupts the PS-induced JM dimer, thus promoting  
311 oligomerization of the peptides.

312 It should be noted that the  $E_{FRET}$  distribution was broad in every one of our  
313 observations in this present study, especially between JM domains, indicating multiple  
314 configurations coexisting under each condition. Non-phosphorylated peptide dimers  
315 showed a peak at around  $E_{FRET} \sim 0.8$  both for N- and C-terminus labeling. We can attribute  
316 this configuration to that suggested in a previous NMR study, in which two JM domains  
317 form an anti-parallel helix dimer (9). PS stabilized this configuration probably at the JM  
318 side of the non-phosphorylated peptide. Acidic lipids are known to interact with the  
319 positively charged JM-A domain (18, 28) whereas cholesterol induced more proximation  
320 of the two peptides at the both N- and C-termini in the major configuration ( $E_{FRET} > 0.9$ ),  
321 which must be distinct from the arrangement containing antiparallel JM helices (Fig. 8).  
322 If the TM-JM domains of whole EGFR dimer adopt similar configurations as suggested  
323 for the TM-JM peptides in the nanodiscs, the arrangement of two kinase domains  
324 indicates namely, the kinase activity would be affected by the lipid composition and by  
325 pT654 (Fig. 11e).

326 Cholesterol was found in our current analysis to increase the population of  
327 nanodiscs containing three TM-JM peptides with pT654 (Fig. 5). The fluorescence  
328 intensity distributions of the two Cy3 probes among the three peptides in the presence of  
329 cholesterol suggested that a close trimer was the major configuration (Figs. 6 and 7). The  
330 cholesterol-induced oligomerization of TM peptides with a short JM region (to T654) of  
331 EGFR in liposomes has been reported previously from NMR analysis (29). In that report  
332 however, pT654 in the peptide showed no obvious effect on the oligomerization in PC  
333 and PC/cholesterol liposomes (without any acidic lipids), consistent with our current and

334 previous results indicating interplay of acidic lipids and pT654. The induction of  
335 oligomerization seems to be a general effect of cholesterol upon  $\alpha$ -helix peptides in lipid  
336 bilayers (30). While in the PC/PS membrane without cholesterol (Figs. 6 and 7), the  
337 probability to adopt a one dimer + one monomer configuration seems to be increased for  
338 the non-phosphorylated peptides, likely because peptides have difficulty forming trimers  
339 when containing the anti-parallel helix JM dimer, the pT654 event appears to dissociate  
340 the JM dimer to help in the formation of the close trimer especially in the presence of  
341 cholesterol. If this assumption is correct, oligomer formation will be inhibitory for EGFR  
342 kinase activity. Our observed increases in the pY1068 level in the T654A mutant of EGFR  
343 (Fig. 9) support this possibility.

344 The antiparallel helix dimer of JM is thought to facilitate asymmetric interaction  
345 between the kinase domains of EGFR, and hence its activation, in order to phosphorylate  
346 tyrosine residues in the C-tail (11, 31). This tyrosine phosphorylation results in the  
347 recruitment of PKC and other threonine kinases from the cytoplasm to the EGFR  
348 molecules for the phosphorylation of Thr654, which is known to negatively regulate  
349 EGFR signaling (25, 32). Our previous results suggested that the mechanism underlying  
350 this negative effect of pT654 is the dissociation of JM dimers in the presence of acidic  
351 lipids (19). At the same time, pT654 might induce the oligomerization of EGFR in the  
352 presence of cholesterol. Supporting this possibility, our current single-molecule imaging  
353 in living cells revealed the oligomerization of unliganded wt EGFR after PMA treatment,  
354 which induced pT654 (Fig. 10). We previously reported that oligomers of EGFR formed  
355 after cell stimulation with EGF function as the major signal transduction sites for GRB2  
356 (14). In addition, our current analyses found an increase in the wt EGFR/GRB2  
357 association following PMA treatment (Fig. 11). We speculate that the formation of signal  
358 transduction oligomers is enhanced in the medium immobilized and oligomerized state  
359 of EGFR molecules (Fig. 10d). Further immobilization and oligomerization were found  
360 in our current experiments to be induced by EGF in the absence of PMA for wt EGFR  
361 and with or without PMA for the T654A mutant. This process might include EGFR  
362 molecules accumulated into the clathrin coated pits (33) and be independent of pT654.  
363 Distinct from wt EGFR, the T654A mutation in EGFR suppressed the GRB2 association  
364 after EGF association in spite of the higher levels of Tyr phosphorylation at the binding  
365 site compared to wt. Thus, even though pT654 is inhibitory for EGFR kinase activity, it  
366 promotes signal transduction to the cytoplasmic protein, GRB2.

367 Based on our present results, we propose a model of EGFR signaling regulated  
368 by membrane lipids and Thr654 phosphorylation (Fig. 11e). The signal transduction  
369 mediated by EGFR is a complex multi-step process. Conformational changes in the

370 extracellular domain of EGFR upon ligand association allow JM domains to form acidic  
371 lipid-facilitated anti-parallel JM helix dimers and asymmetric kinase domain dimers. This  
372 is the activation process for EGFR kinase. Tyrosine phosphorylation in the kinase-active  
373 EGFR dimers recruits PKC from the cytoplasm (34). The association of PLC $\gamma$  to the  
374 EGFR phosphotyrosine for the degradation of PIP<sub>2</sub> is involved in this process. PKC then  
375 phosphorylates Thr654 (35), which dissociates anti-parallel JM dimers in the presence of  
376 remaining acidic lipids and supports the oligomerization of EGFR in the presence of  
377 cholesterol, especially after the removal of acidic lipids around the EGFR molecules. The  
378 cholesterol-induced oligomer of EGFR is a major site of interaction with cytoplasmic  
379 proteins including GRB2. Thus, a major function of EGFR is shifted from a kinase for  
380 self-activation to a scaffold for signal transduction. Thr654 phosphorylation is a key step  
381 underlying this role change of EGFR and is not merely an inactivating mechanism. The  
382 degradation of PIP<sub>2</sub>, a major anionic lipid in the inner leaflet of the plasma membrane,  
383 may support this role change. Importantly, both Thr654 phosphorylation and PIP<sub>2</sub>  
384 degradation are caused by the kinase activation of EGFR. Hence, this represents an  
385 ingenious autoregulatory process involving membrane proteins and lipids.  
386

## 387 **Materials and Methods**

### 388 **Materials**

389 1-palmitoyl-2-oleoyl-*sn*-phosphatidylcholine (PC), 1-palmitoyl-2-oleoyl-*sn*-  
390 phosphatidylserine (PS), and cholesterol were purchased from Avanti Polar Lipids  
391 (Alabaster, AL) as chloroform solutions (PC and PS) or powders (cholesterol). Cy3-  
392 maleimide and Cy5-maleimide were purchased from GE Healthcare Life Sciences (Little  
393 Chalfont, UK). n-octyl- $\beta$ -D-glucoside (OG) was purchased from Dojindo (Kumamoto,  
394 Japan). Monofunctional polyethylene glycol-succinimidyl valerate (s-PEG, 5000 mol wt)  
395 and biotinylated monofunctional polyethylene glycol-succinimidyl valerate (b-PEG,  
396 5000 mol wt) were purchased from Laysan Bio (Arab, AL). Chinese hamster ovary K1  
397 (CHO-K1) cells were provided from RIKEN BRC through the National Bio-Resource  
398 Project (MEXT, Tokyo, Japan).

399

### 400 **Plasmid construction**

401 Construction of the cDNA of full-length human EGFR (wt) fused with GFP was described  
402 previously (14). T654A mutant DNA was constructed using PrimeSTAR Max (Takara,  
403 Kusatsu, Japan) in the wt EGFR vector. The primer sequences were as follows:  
404 EGFR(T654A)-f: GAAGCGCGCGCTGCGGAGGCTGCTGC and EGFR(T654A)-r:  
405 CCGCAGCGCGCGCTTCCGAACGATGTG, respectively. For NanoBiT assays, full-  
406 length human EGFR (wt or T654A mutant) was fused with LgBiT at the C-terminus (wt  
407 or T654A EGFR-LgBiT), and GRB2 was fused with SmBiT at the N-terminus (GRB2-  
408 SmBiT) as follows. The LgBiT fragment amplified from pBiT1.1-C [TK/LgBiT] Vector  
409 (Promega) using KOD One PCR Master Mix (TOYOBO) was subcloned into the AgeI-  
410 and NotI-digested EGFP-N1 vector (Clontech), and subsequently full-length EGFR  
411 fragment was subcloned into the NheI- and HindIII-digested the LgBiT-inserted EGFP-  
412 N1 vector. The GRB2-SmBiT fragment was constructed using KOD One PCR Master  
413 Mix (TOYOBO), and subcloned into the AgeI- and SallI-digested EGFP-C2 vector  
414 (Clontech). The primer sequence of SmBiT was designed from pBiT2.1-N [TK/SmBiT]  
415 Vector (Promega).

416

### 417 **Peptide synthesis and purification**

418 Peptides corresponding to the TM-JM regions of EGFR (618-666) were synthesized by  
419 solid-phase methods with the sequence KIPSIATGMV GALLLLL VVALGIGLFM-  
420 RRRHIVRKRT<sub>654</sub>LRLLQERELVE-NH<sub>2</sub> (28). For the experiments with the C-terminal  
421 labeled EGFR peptide, peptides containing a cysteine at the C-terminus were synthesized.  
422 These synthetic peptides were purified by reverse-phase high-performance liquid

423 chromatography on a C4 column with a gradient of 1-propanol and acetonitrile (1:1) over  
424 0.1% aqueous trifluoroacetic acid. To prepare the C-terminal labeled peptide, Cy3-  
425 maleimide or Cy5-maleimide was introduced to the sulfide group on the cysteine at the  
426 C-terminus of the TM-JM peptide by mixing the peptide and the fluorescence derivative  
427 in dimethyl formamide under basic conditions. For experiments with the N-terminal  
428 labeled peptide, Cy3-COOH or Cy5-COOH was reacted with an elongating peptide on  
429 the resin in the presence of 1-[bis(dimethylamino)methylene]-1H-benzotriazolium 3-  
430 oxide hexafluorophosphate (HBTU) and diisopropylethylamine (DIEA), which activate  
431 the carboxyl group on the fluorophore derivative. For synthesis of Thr654 phosphorylated  
432 peptides, phosphorylated threonine derivatives were utilized. The purity was confirmed  
433 by reverse-phase high-performance liquid chromatography and matrix-assisted laser-  
434 desorption/ionization time-of-flight mass spectroscopy analysis.

435

#### 436 **Nanodisc preparation**

437 For nanodisc construction, fluorescent EGFR TM-JM peptides co-solubilized with lipids  
438 and OG in hexafluoroisopropanol were first dried to form thin films. These peptide films  
439 were then resolubilized in buffer A (0.5 M NaCl, 20 mM Tris/Cl, 0.5 mM EDTA)  
440 containing 30 mM OG and 5 mM dithiothreitol (pH 7.5). His8-tagged MSP 1E3D1 (MSP)  
441 was expressed in *E. coli* and purified as described previously (36). The concentration of  
442 MSP was quantified based on the absorbance at 280 nm ( $29,910 \text{ M}^{-1}\text{cm}^{-1}$ ). Thin PC or PS  
443 films were formed by evaporation of the solvent (chloroform) under a steam of nitrogen  
444 gas and dried in vacuum. Cholesterol powders were first dissolved in chloroform, and a  
445 thin film was formed as described above. PC, PS, and cholesterol were resuspended in  
446 buffer A containing 0.4 M sodium cholate (pH 7.5) at a final concentration of 10 mM.  
447 Cy3- and Cy5-labeled TM-JM peptides in buffer A were mixed in equal amounts and then  
448 conjugated with MSP and phospholipid mixtures (PC, PC/PS, PC/cholesterol,  
449 PC/PS/cholesterol) at a molar ratio of 1:1:120  $\mu\text{M}$  (TM-JM/MSP/lipids). The mixture was  
450 dialyzed against a buffer containing 0.5 M NaCl, 20 mM Tris/Cl, and 5 mM EDTA (pH  
451 7.5) at 4°C to reconstitute the nanodiscs by removing the detergent. The aggregates and  
452 liposomes were removed from the mixture by size-exclusion chromatography using a  
453 Superdex 200 Increase column (GE Healthcare Life Sciences) and the peak fractions  
454 containing nanodiscs of around 11 nm in diameter were collected.

455

#### 456 **Single-pair FRET (spFRET) measurements**

457 Nanodisc samples were immobilized on the surface of a glass chamber as described  
458 previously (19, 37, 38). Briefly, amine-modified glass surfaces were coated with 99% s-

459 PEG and 1% b-PEG. NeutrAvidin (Thermo Fisher Scientific, Waltham, MA) was then  
460 bound to the b-PEG. The nanodisc samples bound with biotinylated anti-His8-tag  
461 antibody (MBL Life Science) were loaded into the glass chamber and allowed to bind to  
462 the NeutrAvidin-coated glass surface, after which unbound nanodiscs were washed away.  
463 To reduce the photobleaching rate of Cy3 and Cy5, the nanodisc-loaded chamber was  
464 filled with dialysis buffer containing 2-mercaptoethanol at the final concentration of 0.5%  
465 (w/v). The fluorescence of Cy3 and Cy5 was observed under a TIRF microscope based  
466 on an inverted microscope (Ti2; Nikon) with a 60x oil-immersion objective (ApoTIRF  
467 60x 1.49 NA; Nikon). The fluorescence activity of Cy3 was excited using a 532 nm laser  
468 (Compass 315M-100). Dual-color imaging was carried out through a 4x relay lens by  
469 using two EMCCD cameras (C9100-134, ImagEM; Hamamatsu Photonics, Hamamatsu,  
470 Japan) with a 200x EM gain. Images of 512 x 512 pixels (67 nm/pixel) were recorded  
471 with a temporal resolution of 100 ms/frame using MetaMorph (Molecular Devices, San  
472 Jose, CA) or AIS (ZIDO, Toyonaka, Japan).

473

#### 474 **Analysis of FRET signals**

475 The measurement of fluorescence intensities of single nanodiscs was performed using  
476 ImageJ software, as described previously (39). The background noise was filtered out  
477 using the Subtract Background function in ImageJ. Fluorescence intensities of Cy3 and  
478 Cy5 in single nanodiscs were measured as averages from circles with a diameter of 12  
479 pixels containing a fluorescence spot. The average intensity of the same sized circles in  
480 which no spot was present was subtracted as the background. Along the fluorescence  
481 trajectories of TM-JM-Cy3 and TM-JM-Cy5, the FRET efficiency,  $E_{FRET}$ , for each frame  
482 was calculated from the fluorescence intensities in the donor  $I_D$  and FRET  $I_A$  channels as

$$483 \quad E_{FRET} = \frac{I_A - \beta I_D}{I_A + (\gamma - \beta) I_D},$$

484 where  $\beta$  and  $\gamma$  are coefficients for the compensation of fluorescence leakage from the  
485 donor dye to the acceptor detector channel, and the difference in the detection efficiencies  
486 of the dyes, respectively (40). Coefficients were calculated using the intensity time traces  
487 as  $\beta = 0.03$  and  $\gamma = 0.4$ , respectively.

488

#### 489 **Cell culture and transfection**

490 CHO-K1 cells were maintained in HAM F12 medium supplemented with 10% fetal  
491 bovine serum at 37°C under 5% CO<sub>2</sub>. HEK293S cells were maintained in DMEM F12  
492 medium supplemented with 10% fetal bovine serum at 37°C under 5% CO<sub>2</sub>. For western



493 blotting assays, DNA constructs of full-length wt and T654A EGFR (1  $\mu$ g) were  
494 transiently transfected into CHO-K1 cells using FuGENE HD Transfection Reagent  
495 (Promega, Madison, WI). For single-molecule measurements, CHO-K1 cells were  
496 transfected with either a wt or T654A EGFR-GFP gene (0.5  $\mu$ g each) using Lipofectamine  
497 3000 Reagent (Thermo Fisher Scientific). For NanoBiT assays, HEK293S cells were  
498 transfected with a mixture of wt or T654A EGFR-LgBiT gene (1  $\mu$ g each) and GBR2-  
499 SmBiT (0.2  $\mu$ g) using Lipofectamine 3000 Reagent in 60 mm dish.

500

#### 501 **PMA treatment and EGF stimulation**

502 DNA constructs of full-length wt and T654A EGFR were transfected and cultured with  
503 10% fetal bovine serum (FBS) on the day before each measurement. Cells were then  
504 starved in modified Eagle's medium without FBS for 3 hours before the experiment.  
505 Phorbol 12-myristate 13-acetate (PMA) was dissolved in DMSO and subsequently  
506 diluted in PBS to a final concentration of 10  $\mu$ M. For PMA pre-treatment, PMA solution  
507 was added to the cell cultured medium at a final concentration of 100 nM and incubated  
508 for 30 min at room temperature. For EGF stimulation, EGF (PeproTech, Cranbury, NJ)  
509 dissolved in PBS was added to the cell cultured medium at a final concentration of 100  
510 ng/mL (for western blotting assays and single-molecule measurements) or as a 0.001 to  
511 100 nM dilution series (for the NanoBiT assay).

512

#### 513 **Western blotting analysis**

514 In cells stimulated with EGF for 0, 5, 30 min at 37°C, threonine and tyrosine  
515 phosphorylation of the wt and mutant T654A proteins was detected by western blotting  
516 using rabbit anti-pT654 (ab75986; Abcam, Cambridge, UK) and rabbit anti-pY1086  
517 antibody (#4407; Cell Signaling Technology, Danvers, MA), respectively. Rabbit anti-  
518 EGFR antibody (#sc-03; Santa Cruz Biotechnology, Dallas, TX) was used to detect  
519 protein expression. After being resolved by SDS-polyacrylamide gel electrophoresis  
520 (PAGE), the electrophoresed proteins were transferred onto a polyvinylidene difluoride  
521 (PVDF) membrane and incubated with each antibody (primary antibody) and then with a  
522 horseradish peroxidase (HRP)-linked anti-rabbit IgG (secondary antibody; 7076, Cell  
523 Signaling Technology). Immunoreactive proteins were detected with Amersham ECL  
524 Prime Western Blotting Detection Reagent (GE Healthcare) using an ImageQuant LAS  
525 500 device (GE Healthcare).

526

#### 527 **Single-molecule imaging in living cells**

528 The methods for single-molecule measurement and analysis were described elsewhere

529 (Yanagawa and Sako, *Methods in Mol Biol*, in press; bioRxiv: doi:  
530 10.1101/2020.06.08.141192). The single-molecule imaging of EGFR was performed at  
531 the basal plasma membrane of the CHO-K1 cells at 25°C with the same microscopic  
532 methods used for the spFRET measurements. The laser wavelength was 488 nm (Sapphire  
533 488; Coherent, Santa Clara, CA) for the excitation of the GFP. Fluorescence images were  
534 acquired every 50 ms using AIS software. The acquired multiple TIFF files were  
535 processed by ImageJ software as follows: background subtraction was performed with a  
536 rolling ball radius of 25 pixels, and two-frame averaging of the images was then  
537 performed. Single-molecule tracking analysis was performed with AAS software (ZIDO).  
538 All subsequent analyses were performed using smDynamicsAnalyzer  
539 (<https://github.com/masataka-yanagawa/IgorPro8-smDynamicsAnalyzer>), an Igor Pro  
540 8.0 (WaveMetrix)-based homemade program.

541

#### 542 **NanoBiT assay**

543 HEK293S cells co-transfected with the plasmids of wt or T654A EGFR-LgBiT and  
544 GRB2-SmBiT. Overnight after the transfection, cells were collected in 0.5 mM EDTA-  
545 containing PBS, centrifuged, and suspended in 2 mL of HBSS containing 0.01 % bovine  
546 serum albumin and 5 mM HEPES (pH 7.4) (assay buffer). The cell suspension was  
547 dispensed in a 96-well white bottom plate at a volume of 80  $\mu$ L per well and loaded with  
548 20  $\mu$ L of 25  $\mu$ M Nano-Glo Vivazine Live Cell Substrates (Promega) diluted in the assay  
549 buffer. After incubation for 2 hrs at room temperature, cells were pretreated with PMA or  
550 vehicle as described above. Basal luminescence was then measured by using a microplate  
551 reader (SpectraMax L, Molecular Devices) with an interval of 60 sec at room temperature.  
552 After 10 min, 20  $\mu$ L of the EGF dilution series in the assay buffer or the assay buffer  
553 (vehicle) were applied to each well using a benchtop multi-pipetter (EDR-384SR, BioTec,  
554 Tokyo, Japan) under red dim light. Then, luminescence was measured for 30 min with an  
555 interval of 60 sec. Each time-course of luminescence counts was normalized with the  
556 luminescence counts of the vehicle-added well. Dose-response curves were fitted with a  
557 Hill-equation to determine the maximum intensity.

558

559 **Acknowledgments**

560 YS was supported by MEXT Japan with Grants-in-Aid for Scientific Research  
561 (19H05647) and by JST CREST (JPMJCR1912). We thank Hiromi Sato for technical  
562 assistance.

563

564 **Author contributions**

565 Conceptualization, R.M., Y.S.; methodology, R.M., T.S., M.Y., Y.S.; investigation, R.M.,  
566 H. T., T. S., M.Y.; manuscript writing, R.M., T. S., Y.S. with feedback from all other  
567 coauthors; funding acquisition, Y.S.; supervision, Y.S.

568

569 **Conflicts of interest**

570 None.

571

## 572 **References**

- 573 1. M. A. Olayioye, R. M. Neve, H. A. Lane, N. E. Hynes, The ErbB signaling network:  
574 receptor heterodimerization in development and cancer. *EMBO J.* **19**, 3159-3167  
575 (2000).
- 576 2. M. K. Nyati, M. A. Morgan, F. Y. Feng, T. S. Lawrence, Integration of EGFR inhibitors  
577 with radiochemotherapy. *Nat. Rev. Cancer* **6**, 876-885 (2006).
- 578 3. E. Kovacs, J. A. Zorn, Y. Huang, T. Barros, J. Kuriyan, A structural perspective on the  
579 regulation of the epidermal growth factor receptor. *Annu. Rev. Biochem.* **84**, 739-764  
580 (2015).
- 581 4. N. J. Bessman, M. A. Lemmon, Finding the missing links in EGFR. *Nat. Struct. Mol.*  
582 *Biol.* **19**, 1-3 (2012).
- 583 5. H. Ogiso *et al.*, Crystal structure of the complex of human epidermal growth factor and  
584 receptor extracellular domains. *Cell* **110**, 775-787 (2002).
- 585 6. X. Zhang, J. Gureasko, K. Shen, P. A. Cole, J. Kuriyan, An allosteric mechanism for  
586 activation of the kinase domain of epidermal growth factor receptor. *Cell* **125**, 1137-  
587 1149 (2006).
- 588 7. M. J. Wagner, M. M. Stacey, B. A. Liu, T. Pawson, Molecular mechanisms of SH2- and  
589 PTB-domain-containing proteins in receptor tyrosine kinase signaling. *Cold Spring*  
590 *Harb Perspect Biol* **5**, a008987 (2013).
- 591 8. K. M. Ferguson *et al.*, EGF activates its receptor by removing interactions that  
592 autoinhibit ectodomain dimerization. *Mol. Cell* **11**, 507-517 (2003).
- 593 9. N. F. Endres *et al.*, Conformational coupling across the plasma membrane in activation  
594 of the EGF receptor. *Cell* **152**, 543-556 (2013).
- 595 10. E. R. Wood *et al.*, A unique structure for epidermal growth factor receptor bound to  
596 GW572016 (Lapatinib): relationships among protein conformation, inhibitor off-rate,  
597 and receptor activity in tumor cells. *Cancer Res.* **64**, 6652-6659 (2004).
- 598 11. N. Jura *et al.*, Mechanism for activation of the EGF receptor catalytic domain by the  
599 juxtamembrane segment. *Cell* **137**, 1293-1307 (2009).
- 600 12. S. E. Webb *et al.*, Single-molecule imaging and fluorescence lifetime imaging microscopy  
601 show different structures for high- and low-affinity epidermal growth factor receptors in  
602 A431 cells. *Biophys. J.* **94**, 803-819 (2008).
- 603 13. Y. Huang *et al.*, Molecular basis for multimerization in the activation of the epidermal  
604 growth factor receptor. *Elife* **5** (2016).
- 605 14. M. Hiroshima *et al.*, Transient Acceleration of Epidermal Growth Factor Receptor  
606 Dynamics Produces Higher-Order Signaling Clusters. *J. Mol. Biol.* **430**, 1386-1401  
607 (2018).

- 608 15. N. Jura, Y. Shan, X. Cao, D. E. Shaw, J. Kuriyan, Structural analysis of the catalytically  
609 inactive kinase domain of the human EGF receptor 3. *Proc Natl Acad Sci U S A* **106**,  
610 21608-21613 (2009).
- 611 16. A. Arkhipov *et al.*, Architecture and membrane interactions of the EGF receptor. *Cell*  
612 **152**, 557-569 (2013).
- 613 17. M. Lelimosin, V. Limongelli, M. S. Sansom, Conformational Changes in the Epidermal  
614 Growth Factor Receptor: Role of the Transmembrane Domain Investigated by Coarse-  
615 Grained MetaDynamics Free Energy Calculations. *J. Am. Chem. Soc.* **138**, 10611-10622  
616 (2016).
- 617 18. C. Matsushita *et al.*, Transmembrane helix orientation influences membrane binding of  
618 the intracellular juxtamembrane domain in Neu receptor peptides. *Proc Natl Acad Sci U*  
619 *SA* **110**, 1646-1651 (2013).
- 620 19. R. Maeda, T. Sato, K. Okamoto, M. Yanagawa, Y. Sako, Lipid-Protein Interplay in  
621 Dimerization of Juxtamembrane Domains of Epidermal Growth Factor Receptor.  
622 *Biophys. J.* **114**, 893-903 (2018).
- 623 20. K. B. Abd Halim, H. Koldso, M. S. P. Sansom, Interactions of the EGFR juxtamembrane  
624 domain with PIP2-containing lipid bilayers: Insights from multiscale molecular dynamics  
625 simulations. *Biochim Biophys Acta* **1850**, 1017-1025 (2015).
- 626 21. Y. Wang *et al.*, Regulation of EGFR nanocluster formation by ionic protein-lipid  
627 interaction. *Cell Res.* **24**, 959-976 (2014).
- 628 22. Y. Liu *et al.*, The involvement of lipid rafts in epidermal growth factor-induced  
629 chemotaxis of breast cancer cells. *Mol. Membr. Biol.* **24**, 91-101 (2007).
- 630 23. T. Furuchi, R. G. Anderson, Cholesterol depletion of caveolae causes hyperactivation of  
631 extracellular signal-related kinase (ERK). *J. Biol. Chem.* **273**, 21099-21104 (1998).
- 632 24. T. Ringerike, F. D. Blystad, F. O. Levy, I. H. Madshus, E. Stang, Cholesterol is  
633 important in control of EGF receptor kinase activity but EGF receptors are not  
634 concentrated in caveolae. *J. Cell Sci.* **115**, 1331-1340 (2002).
- 635 25. K. A. Lund *et al.*, Phosphorylation of the Epidermal Growth-Factor Receptor at  
636 Threonine 654 Inhibits Ligand-Induced Internalization and down-Regulation. *J. Biol.*  
637 *Chem.* **265**, 20517-20523 (1990).
- 638 26. M. Hiroshima, Y. Saeki, M. Okada-Hatakeyama, Y. Sako, Dynamically varying  
639 interactions between heregulin and ErbB proteins detected by single-molecule analysis  
640 in living cells. *Proc Natl Acad Sci U S A* **109**, 13984-13989 (2012).
- 641 27. A. S. Dixon *et al.*, NanoLuc Complementation Reporter Optimized for Accurate  
642 Measurement of Protein Interactions in Cells. *ACS Chem Biol* **11**, 400-408 (2016).
- 643 28. T. Sato, P. Pallavi, U. Golebiewska, S. McLaughlin, S. O. Smith, Structure of the

- 644 membrane reconstituted transmembrane-juxtamembrane peptide EGFR(622-660) and  
645 its interaction with Ca<sup>2+</sup>/calmodulin. *Biochemistry* **45**, 12704-12714 (2006).
- 646 29. D. H. Jones, K. R. Barber, C. W. Grant, The EGF receptor transmembrane domain: 2H  
647 NMR study of peptide phosphorylation effects in a bilayer environment. *Biochemistry*  
648 **37**, 7504-7508 (1998).
- 649 30. K. Matsuzaki, Why and how are peptide-lipid interactions utilized for self-defense?  
650 Magainins and tachyplesins as archetypes. *Biochim Biophys Acta* **1462**, 1-10 (1999).
- 651 31. M. Red Brewer *et al.*, The juxtamembrane region of the EGF receptor functions as an  
652 activation domain. *Mol. Cell* **34**, 641-651 (2009).
- 653 32. X. Li, Y. Huang, J. Jiang, S. J. Frank, ERK-dependent threonine phosphorylation of EGF  
654 receptor modulates receptor downregulation and signaling. *Cell. Signal.* **20**, 2145-2155  
655 (2008).
- 656 33. L. K. Goh, F. Huang, W. Kim, S. Gygi, A. Sorkin, Multiple mechanisms collectively  
657 regulate clathrin-mediated endocytosis of the epidermal growth factor receptor. *J. Cell*  
658 *Biol.* **189**, 871-883 (2010).
- 659 34. K. Oda, Y. Matsuoka, A. Funahashi, H. Kitano, A comprehensive pathway map of  
660 epidermal growth factor receptor signaling. *Mol. Syst. Biol.* **1**, 2005 0010 (2005).
- 661 35. S. Aifa *et al.*, Phosphorylation of Thr654 but not Thr669 within the juxtamembrane  
662 domain of the EGF receptor inhibits calmodulin binding. *Biochem. Biophys. Res.*  
663 *Commun.* **347**, 381-387 (2006).
- 664 36. K. Kojima, Y. Imamoto, R. Maeda, T. Yamashita, Y. Shichida, Rod visual pigment  
665 optimizes active state to achieve efficient G protein activation as compared with cone  
666 visual pigments. *J. Biol. Chem.* **289**, 5061-5073 (2014).
- 667 37. M. Pirchi *et al.*, Single-molecule fluorescence spectroscopy maps the folding landscape  
668 of a large protein. *Nat Commun* **2**, 493 (2011).
- 669 38. R. Lamichhane *et al.*, Single-molecule view of basal activity and activation mechanisms  
670 of the G protein-coupled receptor  $\beta_2$ AR. *Proc. Natl. Acad. Sci. U. S. A.* **112**, 14254-  
671 14259 (2015).
- 672 39. R. Maeda *et al.*, Single-molecule observation of the ligand-induced population shift of  
673 rhodopsin, a G-protein-coupled receptor. *Biophys. J.* **106**, 915-924 (2014).
- 674 40. K. Okamoto, Y. Sako, Variational Bayes Analysis of a Photon-Based Hidden Markov  
675 Model for Single-Molecule FRET Trajectories. *Biophys. J.* **103**, 1315-1324 (2012).
- 676

677 **Figures**

678 **Figure 1.** Construction of nanodiscs containing fluorescent TM-JM peptides of EGFR.  
 679 (a) Amino acid sequence of the EGFR TM and JM-A domains. EX, extracellular domain;  
 680 TK, tyrosine kinase domain. (b, c) Schematic images of nanodiscs containing dimeric  
 681 TM-JM peptides fluorescently labeled at the N- (b) and C-terminus (c), respectively. (d)  
 682 Lipid compositions used in the preparation of each nanodisc sample. The fractional ratios  
 683 of PS and cholesterol mimic those in the mammalian plasma membranes. (e) Size-  
 684 exclusion chromatography used for the purification of nanodiscs containing cholesterol  
 685 (red) or not (black). The charge ratios of PC/PS/cholesterol are described in the upper  
 686 table. The fraction having a peak absorbance of around 12 elution volumes (mL) was  
 687 collected and used for the subsequent experiments. (f) A negative stain electron  
 688 micrograph of fraction 12 in (e). Size distribution of the nanodiscs calculated from the  
 689 images was fitted with a Gaussian function, with a mean diameter of  $11 \pm 2$  nm.

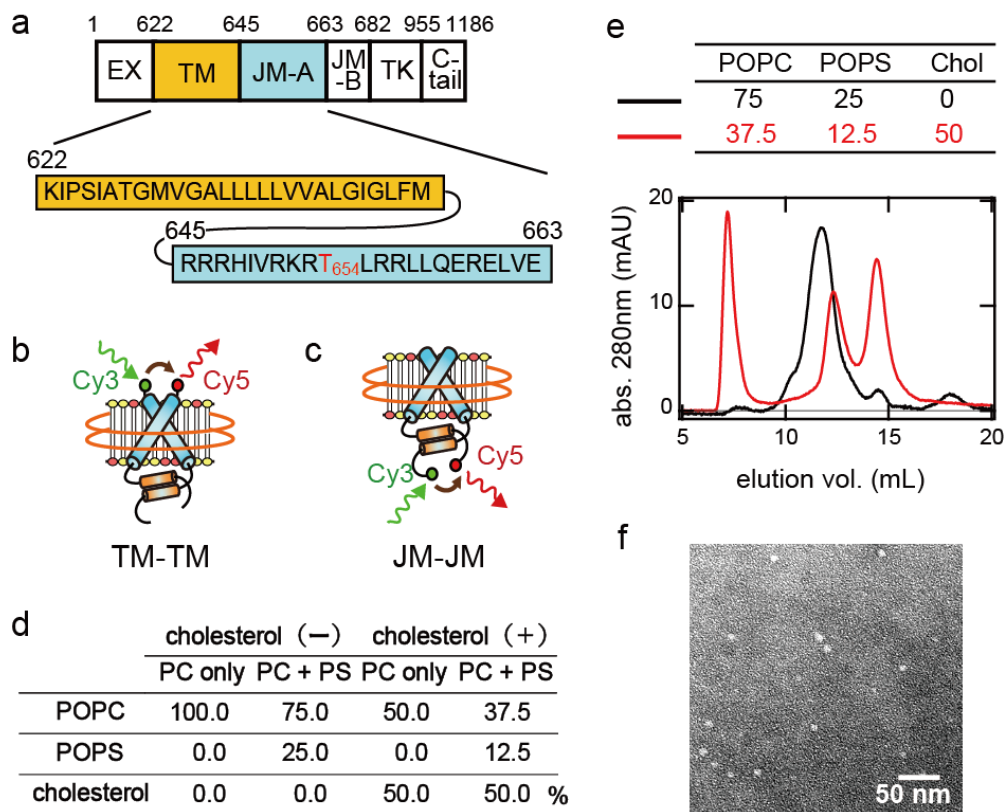

691

692 **Figure 2.** Single-pair FRET measurement of the EGFR TM-JM dimers in nanodiscs. **(a)**  
693 Fluorescence micrograph of nanodiscs illuminated with a green laser. Cy3 (green) and  
694 Cy5 (red) emissions were superimposed. The Cy5 emission was caused by FRET from  
695 Cy3. **(b)** Representative fluorescence trajectories of Cy3 (green) and Cy5 (red). Black  
696 arrows indicate photobleaching points of Cy5. **(c)** FRET efficiency trajectories of the  
697 fluorescence trajectories in **(b)**. The FRET efficiency,  $E_{\text{FRET}}$ , was calculated as described  
698 in the Materials and Methods section. Typical fluorescence and FRET trajectories  
699 between peptides labeled at the C-terminus are shown. Transitions to low FRET  
700 efficiency states suggested that dissociation of the JM dimer occurred occasionally. The  
701 Förster radius  $R_0$  between Cy3 and Cy5 is 5.6 nm.  
702

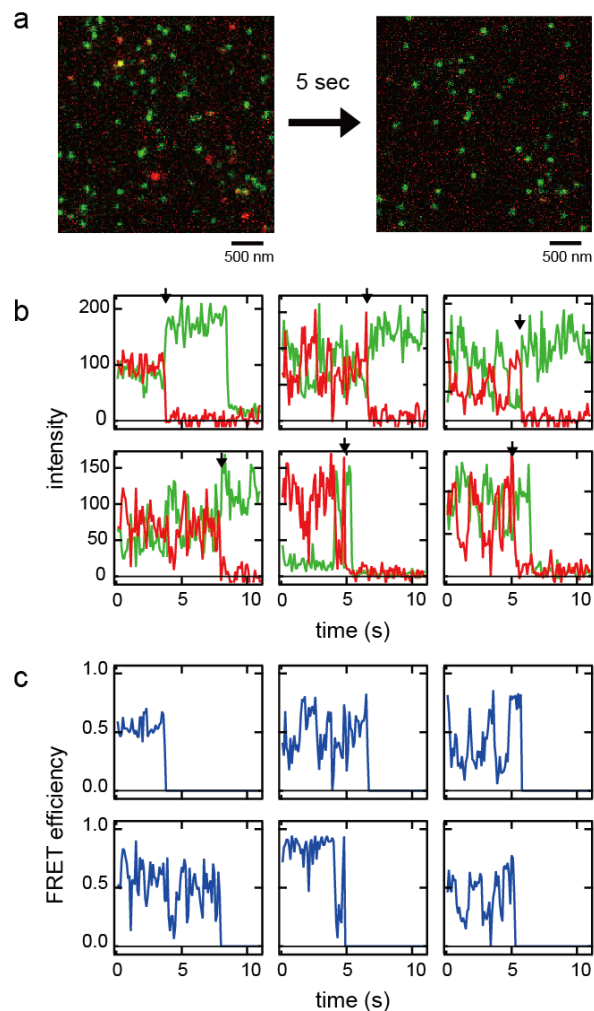

703



704 **Figure 3.** FRET efficiency ( $E_{\text{FRET}}$ ) distributions in nanodiscs containing a single  
705 Cy3/Cy5-pair of N-terminal labeled peptides. Nanodiscs contained non-phosphorylated  
706 (a–d) and Thr654 phosphorylated (e–h) peptides at the indicated lipid conditions. In (b–  
707 h), the distribution shown in (a) (red solid) is superimposed for comparison.  
708

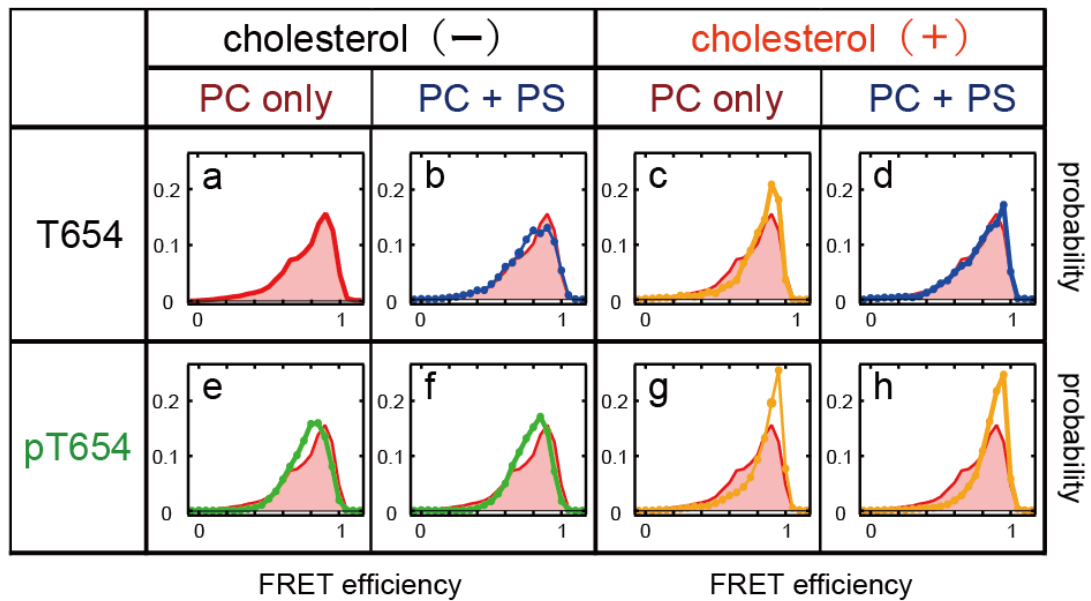

709

710 **Figure 4.**  $E_{\text{FRET}}$  distributions in nanodiscs containing a single Cy3/Cy5-pair of C-terminal  
711 labeled peptides. Nanodiscs contained non-phosphorylated (**a–d**) and Thr654  
712 phosphorylated (**e–h**) peptides in the indicated lipid conditions. In (**b–h**), the distribution  
713 shown in (**a**) (red solid) is superimposed for comparison.  
714

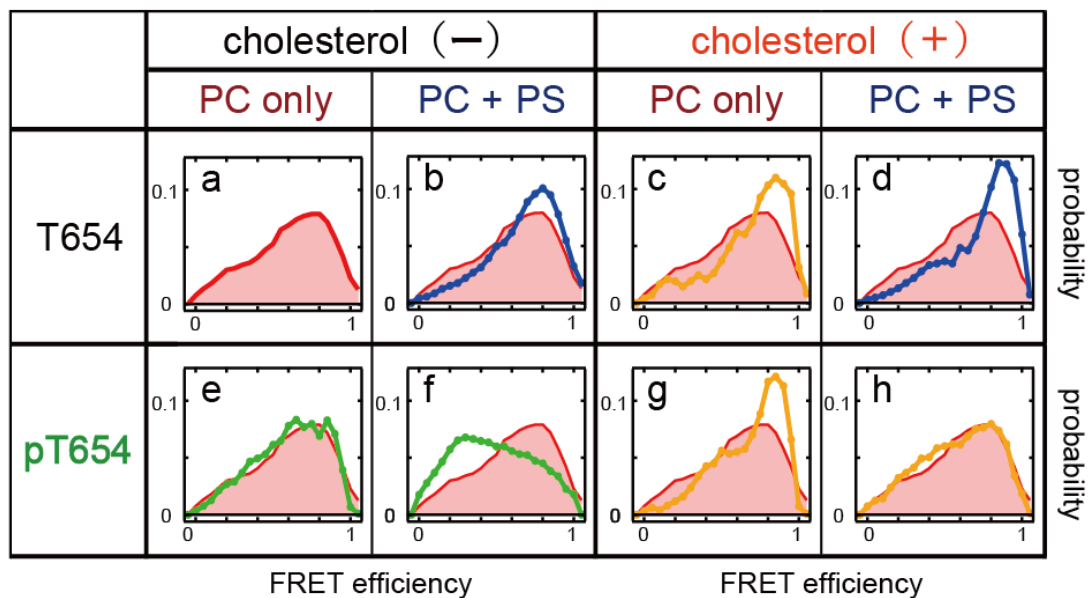

715

716 **Figure 5.** Higher-order oligomerization of EGFR TM-JM peptides in the nanodiscs.  
717 Histograms are shown of the total fluorescence intensity of the peptides with Cy3-labeling  
718 at the C-terminus in single nanodiscs containing cholesterol (blue) or not (red). Discs  
719 containing no Cy5 peptide were chosen for measurement to avoid the possible effects of  
720 FRET. Peptides with a non-phosphorylated (**a, c**) or phosphorylated (**b, d**) Thr654 were  
721 reconstituted into nanodiscs in PC (**a, b**) or PC/PS (**c, d**) membranes.  
722

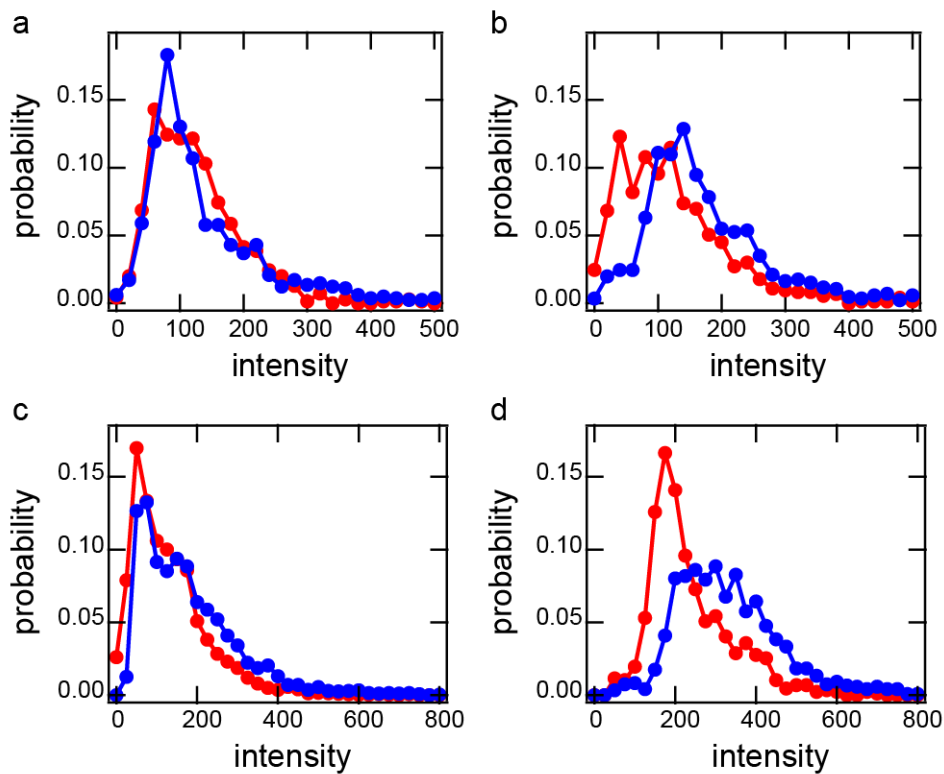

723

724 **Figure 6.** Assembly of EGFR TM regions. **(a)** Representative fluorescence trajectories of  
 725 Cy3 (green) and Cy5 (red) in nanodiscs containing two Cy3-labeled and one Cy5-labeled  
 726 peptide. Fluorescence intensities and/or two-step photobleaching dynamics after Cy5  
 727 photobleaching indicated that these nanodiscs contained two Cy3 peptides. **(b–i)**  
 728 Fluorescence intensity histograms of N-terminal-labeled Cy3 peptides before (blue) and  
 729 after (red) Cy5 photobleaching. Nanodiscs contained non-phosphorylated **(b–e)** and  
 730 Thr654 phosphorylated **(f–i)** peptides at the indicated lipid conditions. **(j)** Schematic  
 731 structures indicating proximity between three TM domains before (left) and after (right)  
 732 Cy5 photobleaching. Note that acceptance of the excitation energy from Cy3 was not  
 733 saturated for Cy5 under our experimental conditions, even in the presence of two Cy3  
 734 molecules.

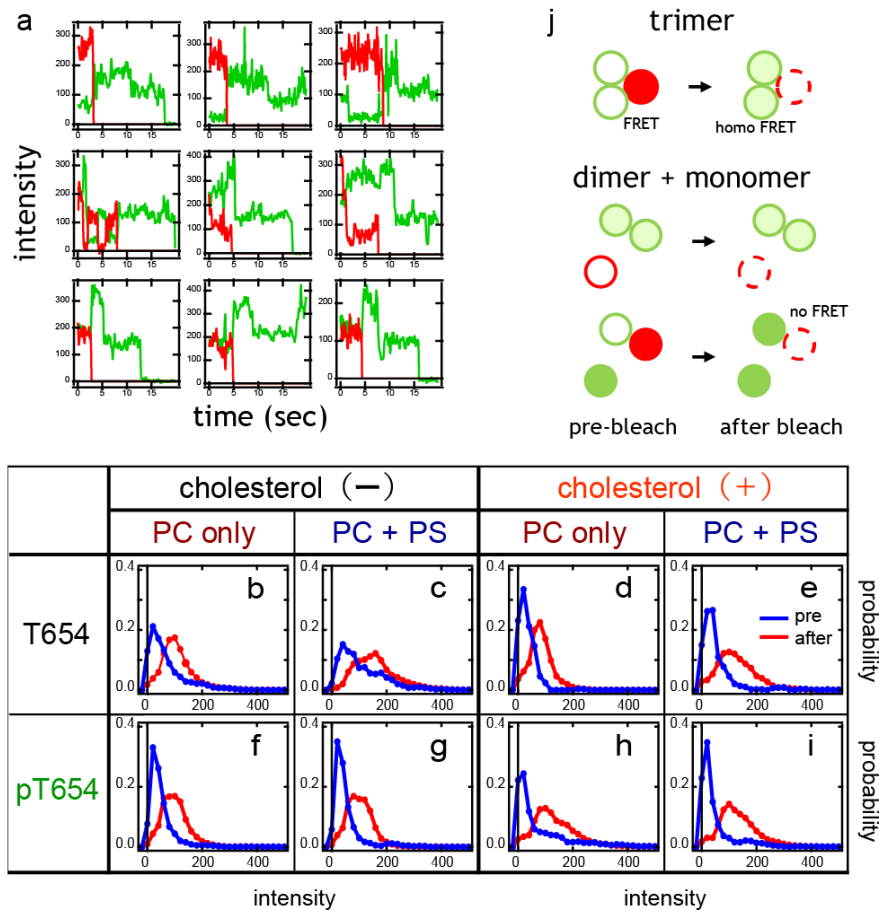

736

737 **Figure 7.** Assembly of EGFR JM regions. **(a)** Representative fluorescence trajectories of  
 738 Cy3 (green) and Cy5 (red) in nanodiscs containing two Cy3-labeled and one Cy5-labeled  
 739 peptide at the C-terminus. **(b–i)** Fluorescence intensity histograms of C-terminal-labeled  
 740 Cy3 peptides from nanodiscs containing two Cy3 and one Cy5 peptide before (blue) and  
 741 after (red) Cy5 photobleaching. Nanodiscs contained non-phosphorylated **(b–e)** and  
 742 Thr654 phosphorylated **(f–i)** peptides at the indicated lipid conditions. **(j)** Schematic  
 743 structures indicating proximity between three JM domains before (left and middle) and  
 744 after (right) Cy5 photobleaching.  
 745

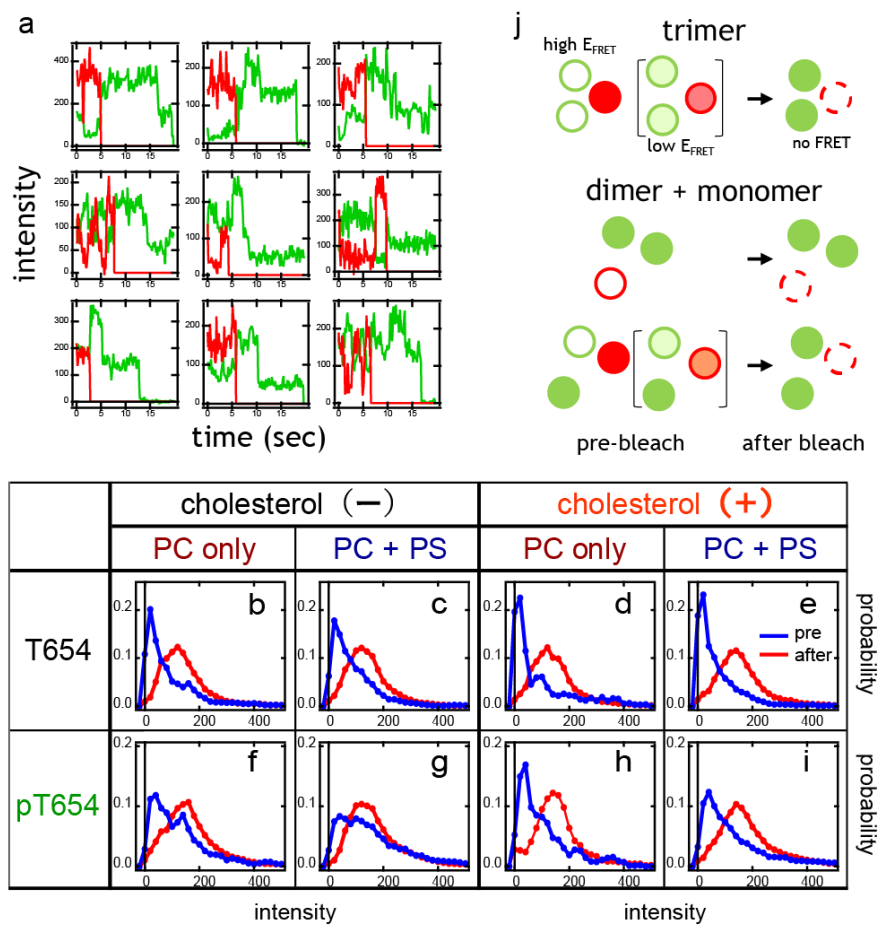

746

747 **Figure 8.** Possible configurations of EGFR TM-JM dimers and trimers regulated by  
748 membrane lipids and Thr654 phosphorylation.  
749

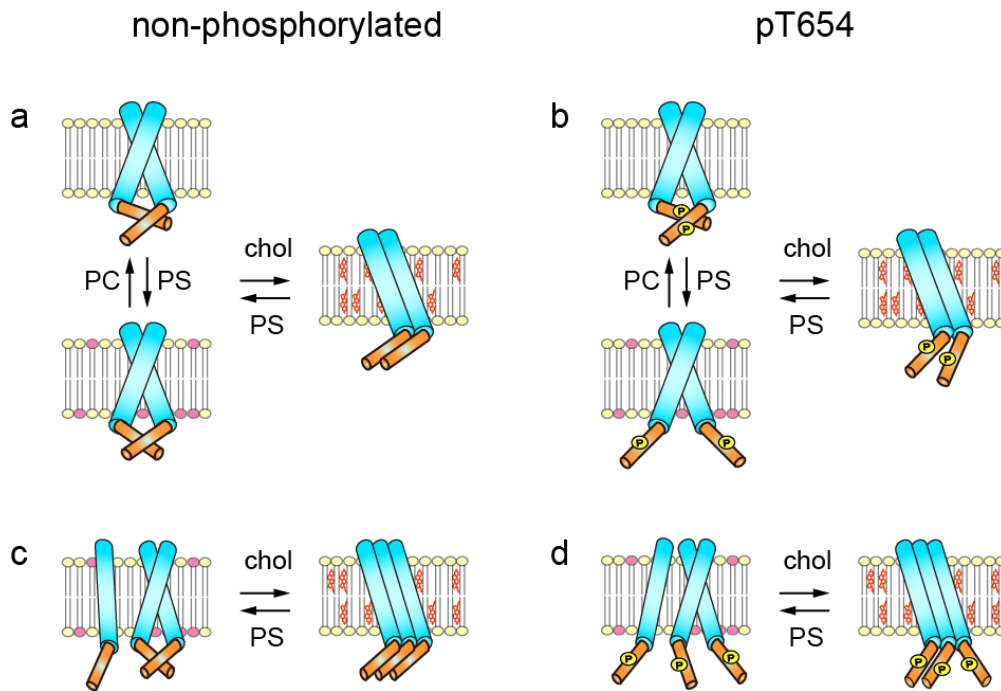

750

751 **Figure 9.** Thr and Tyr phosphorylation of EGFR. **(a)** Thr654 phosphorylation after EGF  
 752 stimulation and PMA treatment. **(b, c)** Timecourses of Y1068 phosphorylation for the wt  
 753 and T654A mutant of EGFR during EGF stimulation. Typical western blotting results are  
 754 indicated **(b, top)** and the average of four independent experiments are shown with SE  
 755 **(c)**. Phosphorylation levels were normalized to the expression levels of the whole EGFR  
 756 molecule **(b, bottom)**.  
 757

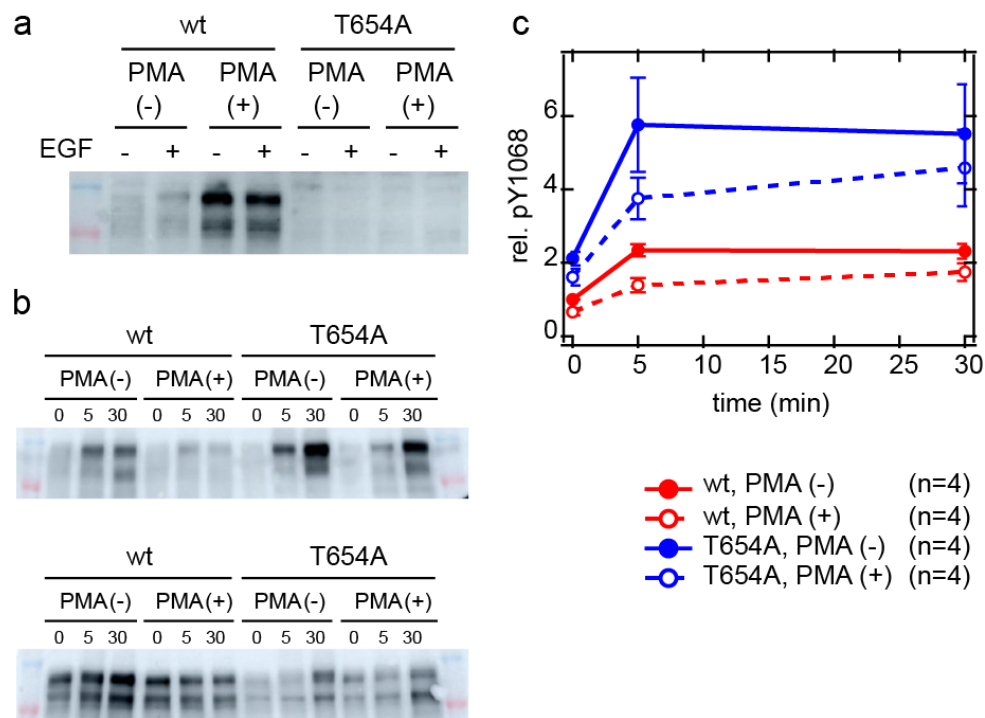

758

759 **Figure 10.** Oligomerization and lateral movements of EGFR on the living cell surface.  
 760 (a) Single molecule imaging of wt EGFR on the surface of living CHO-K1 cells with  
 761 (right) and without (left) PMA treatment. Cells were stimulated with (lower) and without  
 762 (upper) EGF. Bar, 5  $\mu\text{m}$ . (b) Oligomer size distributions of wt (left) and T654A mutant  
 763 (right) EGFR in cells. The oligomer size ratio was measured before and 10 min after EGF  
 764 stimulation. (c) Mean square displacement (MSD) of wt (left) and T654A (right) EGFR  
 765 spots as a function of the time interval, indicating lateral mobility. The MSD was  
 766 calculated before and 10 min after EGF stimulation. In (b, c), cells were pretreated with  
 767 (blue, green) or without (black, red) PMA and stimulated (red, green) or not (black, blue)  
 768 with EGF. (d) Diagram of the oligomerization and immobilization states of wt (left) and  
 769 T654A mutant (right) EGFR suggested from single-molecule measurements. Arrows  
 770 indicate the state transitions after PMA treatment and EGF stimulation.  
 771

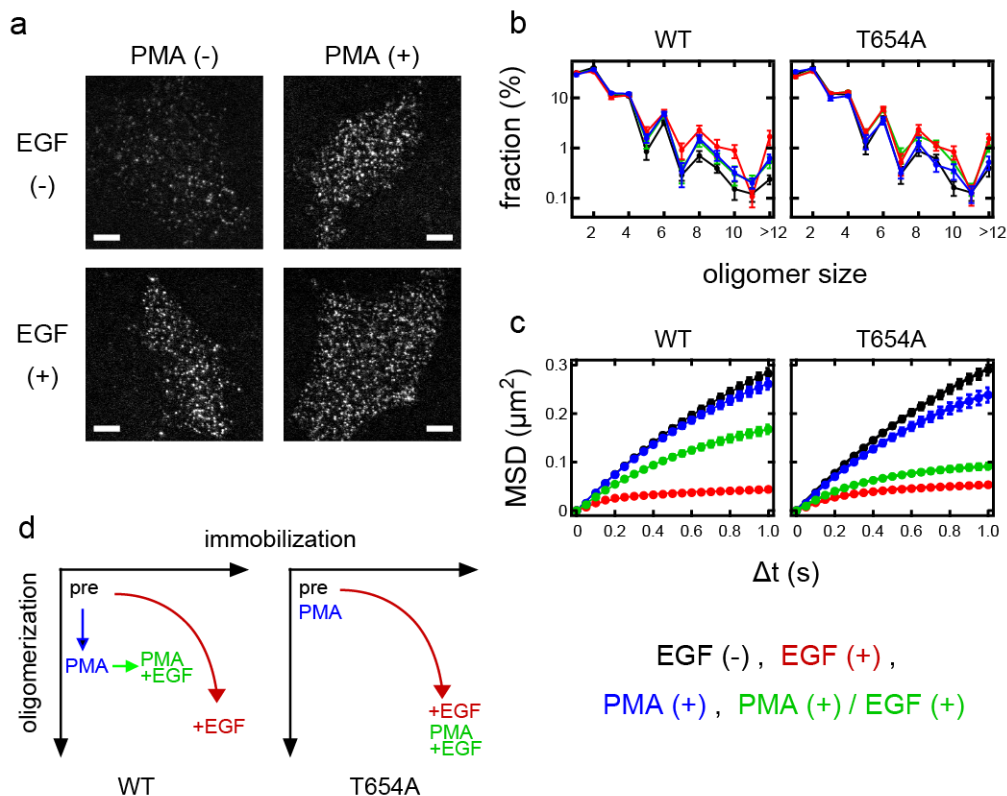

772  
 773  
 774



775 **Figure 11.** NanoBiT assay for the EGFR/GRB2 interaction in living cells. (a) Schematic  
 776 illustration of the NanoBiT assay of EGFR/GRB2 interactions. (b) Typical time courses  
 777 of chemiluminescence signals generated from the complex formation of large BiT  
 778 (LgBiT)-fused EGFR and small BiT (SmBiT)-fused GRB2 after EGF application at time  
 779 0. The final concentration of EGF in the culture medium was varied from 0.0001 to 100  
 780 nM. (c) Dose dependency of the chemiluminescence intensities at 30 min after EGF  
 781 stimulation. The average values from four independent experiments are shown with SE.  
 782 Lines indicate fitting with a Hill-equation function. (d) Maximum intensities of the  
 783 chemiluminescence signal. The average values from four independent experiments are  
 784 shown with SE. (\* $p < 0.05$  determined by  $t$ -test against the signal in wt cells without  
 785 PMA). (e) A schematic model of the activation and signal transduction process for EGFR  
 786 dimers and oligomers.

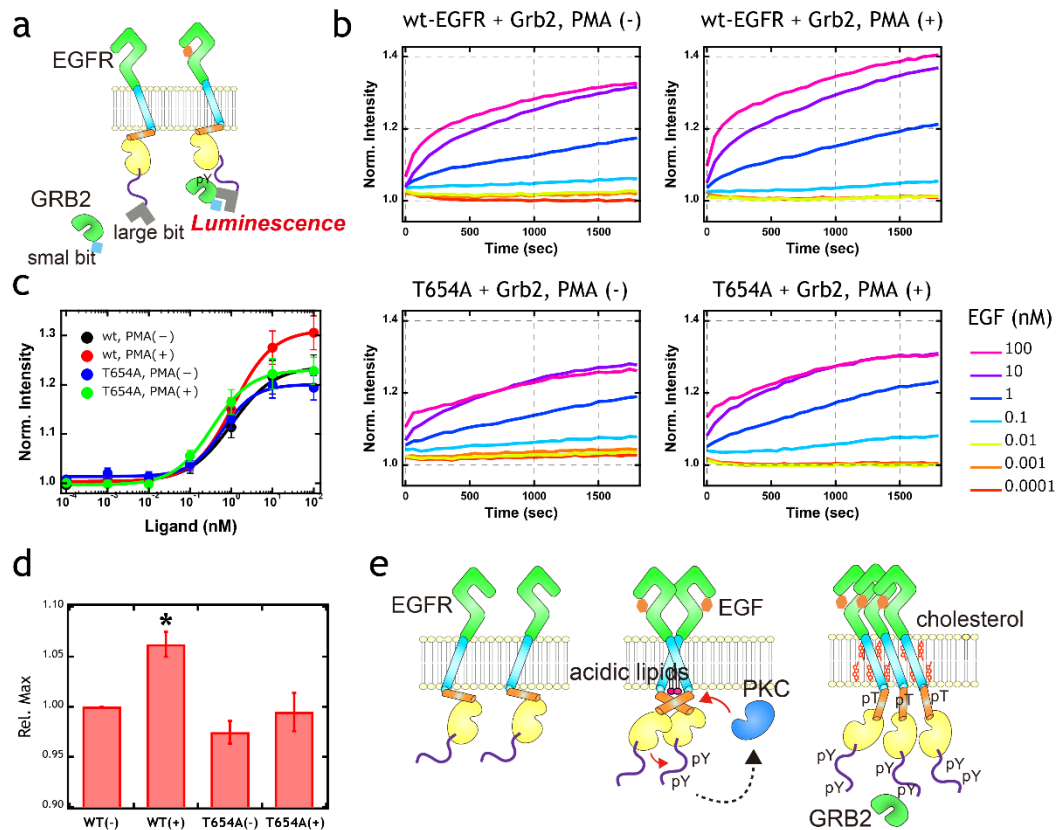

Source: http://biorxiv.org/content/10.1101/2021.05.14.444132v1.full.pdf
